# Supplementary material for: First report of diazotrophic Brevundimonas spp. as growth enhancer and root colonizer of potato
Source: PubMed Central journal article supplement (PMC7393102; doi:10.1038/s41598-020-69782-6), 2020-07-30
Supplement: 41598_2020_69782_MOESM1_ESM.pdf [file 41598_2020_69782_MOESM1_ESM.pdf]

## First Report of diazotrophic *Brevundimonas* spp. as growth enhancer and root colonizer of potato

Tahir Naqqash<sup>1,2\*</sup>, Asma Imran<sup>2</sup>, Sohail Hameed<sup>2,3</sup>, Muhammad Shahid<sup>4</sup>, Afshan Majeed<sup>2,5</sup>, Javed Iqbal<sup>2</sup>, Muhammad Kashif Hanif<sup>2,6</sup>, Shaghef Ejaz<sup>7</sup>, Kauser Abdullah Malik<sup>8</sup>

**Supplementary Table 1** Metabolic potential of selected bacterial isolate TN37 isolated from potato roots

| Carbon Source            | TN37 | Carbon Source                | TN37 | Carbon Source            | TN37 |
|--------------------------|------|------------------------------|------|--------------------------|------|
| Chondroitin Sulfate C    | -    | $\alpha$ -Methyl-D-Mannoside | -    | Quinic Acid              | -    |
| $\alpha$ -Cyclodextrin   | -    | $\beta$ -Methyl-D-Xyloside   | -    | D-Ribono-1,4-Lactone     | -    |
| $\beta$ -Cyclodextrin    | -    | Palatinose                   | -    | Sebacic Acid             | -    |
| $\gamma$ -Cyclodextrin   | -    | D-Raffinose                  | -    | Sorbic Acid              | -    |
| Dextrin                  | -    | Salicin                      | -    | Succinamic Acid          | -    |
| Gelatin                  | -    | Sedoheptulosan               | -    | D-Tartaric Acid          | -    |
| Glycogen                 | +    | L-Sorbose                    | -    | L-Tartaric Acid          | -    |
| Inulin                   | -    | Stachyose                    | -    | L-Alaninamide            | -    |
| Laminarin                | -    | D-Tagatose                   | -    | N-Acetyl-L-Glutamic Acid | +    |
| Mannan                   | +    | Turanose                     | -    | L-Arginine               | -    |
| Pectin                   | +    | Xylitol                      | -    | Glycine                  | -    |
| N-Acetyl-D-Galactosamine | -    | N-Acetyl-D-Glucosaminitol    | -    | L-Histidine              | -    |
| N-Acetyl-Neuraminic Acid | -    | $\gamma$ -Amino Butyric Acid | -    | L-Homoserine             | -    |
| $\beta$ -D-Allose        | -    | $\delta$ -Amino Valeric Acid | -    | Hydroxy-L-Proline        | -    |
| Amygdalin                | -    | Butyric Acid                 | -    | L-Isoleucine             | -    |
| D-Arabinose              | +    | Capric Acid                  | -    | L-Leucine                | -    |
| D-Arabitol               | -    | Caproic Acid                 | -    | L-Lysine                 | -    |
| L-Arabitol               | -    | Citraconic Acid              | -    | L-Methionine             | -    |
| Arbutin                  | -    | Citramalic Acid              | -    | L-Ornithine              | -    |
| 2-Deoxy-D-Ribose         | -    | D-Glucosamine                | +    | L-Phenylalanine          | -    |
| i-Erythritol             | -    | 2-Hydroxy Benzoic Acid       | -    | L-Pyroglutamic Acid      | -    |
| D-Fucose                 | +    | 4-Hydroxy Benzoic Acid       | -    | L-Valine                 | -    |

|                                             |   |                                   |   |                             |   |
|---------------------------------------------|---|-----------------------------------|---|-----------------------------|---|
| <b>3-0-β-D-Galactopyranosyl-D-Arabinose</b> | - | <b>β-Hydroxy Butyric Acid</b>     | - | <b>D,L-Carnitine</b>        | - |
| <b>Gentiobiose</b>                          | - | <b>γ-Hydroxy Butyric Acid</b>     | - | <b>Sec-Butylamine</b>       | - |
| <b>L-Glucose</b>                            | - | <b>α-Keto-Valeric Acid</b>        | - | <b>D.L-Octopamine</b>       | - |
| <b>Lactitol</b>                             | - | <b>Itaconic Acid</b>              | - | <b>Putrescine</b>           | - |
| <b>D-Melezitose</b>                         | - | <b>5-Keto-D-Gluconic Acid</b>     | + | <b>Dihydroxy Acetone</b>    | - |
| <b>Maltitol</b>                             | - | <b>D-Lactic Acid Methyl Ester</b> | - | <b>2,3-Butanediol</b>       | - |
| <b>α-Methyl-D-Glucoside</b>                 | - | <b>Malonic Acid</b>               | - | <b>2,3-Butanone</b>         | - |
| <b>β-Methyl-D-Galactoside</b>               | - | <b>Melibionic Acid</b>            | - | <b>3-Hydroxy 2-Butanone</b> | - |
| <b>3-Methyl Glucose</b>                     | - | <b>Oxalic Acid</b>                | - | <b>Acetamide</b>            | - |
| <b>β-Methyl-D-Glucuronic Acid</b>           | - | <b>Oxalomalic Acid</b>            | + |                             |   |
